## Beyond overweight: nutrition as an important lifestyle factor influencing timing of puberty

Guo Cheng, Anette E Buyken, Lijie Shi, Nadina Karaolis-Danckert, Anja Kroke, Stefan A Wudy, Gisela H Degen, and Thomas Remer

*Early onset of puberty may confer adverse health consequences. Thus, modifiable factors influencing the timing of puberty are of public health interest. Childhood overweight as a factor in the earlier onset of menarche has been supported by prospective evidence; nonetheless, its overall contribution may have been overemphasized, since secular trends toward a younger age at menarche have not been a universal finding during the recent obesity epidemic. Current observational studies suggest notable associations between dietary intakes and pubertal timing beyond contributions to an energy imbalance: children with the highest intakes of vegetable protein or animal protein experience pubertal onset up to 7 months later or 7 months earlier, respectively. Furthermore, girls with high isoflavone intakes may experience the onset of breast development and peak height velocity approximately 7–8 months later. These effect sizes are on the order of those observed for potentially neuroactive steroid hormones. Thus, dietary patterns characterized by higher intakes of vegetable protein and isoflavones and lower intakes of animal protein may contribute to a lower risk of breast cancer or a lower total mortality.*

© 2012 International Life Sciences Institute

### INTRODUCTION

Early onset of puberty is considered an intermediary factor on the life-course path to a number of diseases in adulthood, including hormone-related cancers,<sup>1–5</sup> a higher risk of all-cause mortality,<sup>6,7</sup> metabolic syndrome, and cardiovascular disease.<sup>8,9</sup> In view of these potentially adverse consequences for health in later life, modifiable factors influencing the timing of puberty are of endocrinological and public health relevance. So far, attention has largely focused on secular increases in childhood overweight and their relevance for secular changes in the timing of puberty. These two secular trends coincide to some extent in the United States and developing countries, but not in most European countries. Hence, nutritional factors beyond overweight in the years preceding

pubertal onset as well as during prenatal and early post-natal life may be of interest.

The purpose of this review, therefore, is to briefly compare more recent secular trends in childhood overweight with those in the timing of puberty and to summarize the available evidence regarding the role of other nutritional factors in pubertal timing.

### OVERWEIGHT AND THE ONSET OF PUBERTY

#### Secular trends in overweight and the timing of menarche since 1960–1970

Since the increased prevalence of childhood overweight is a relatively recent finding,<sup>10</sup> this review focuses in

Affiliations: *G Cheng*, *AE Buyken*, *L Shi*, *N Karaolis-Danckert*, and *T Remer* are with the Research Institute of Child Nutrition, Rheinische Friedrich-Wilhelms-University Bonn, Dortmund, Germany. *A Kroke* is with the Fulda University of Applied Sciences, Department of Nutritional, Food, and Consumer Sciences, Fulda, Germany. *SA Wudy* is with the Steroid Research and Mass Spectrometry Unit, Center of Child and Adolescent Medicine, Justus-Liebig-University, Giessen, Germany. *GH Degen* is with the Leibniz Research Centre for Working Environment and Human Factors at the TU Dortmund, Dortmund, Germany.

Correspondence: *G Cheng*, Nutrition and Health Unit, Research Institute of Child Nutrition (FKE), Heinstueck 11, D-44225 Dortmund, Germany. E-mail: [cheng@fke-do.de](mailto:cheng@fke-do.de), Phone: +49-231-79221031, Fax: +49-231-71-15-81.

Key words: hormone, nutrition, timing of puberty

doi:10.1111/j.1753-4887.2011.00461.x

Nutrition Reviews® Vol. 70(3):133–152

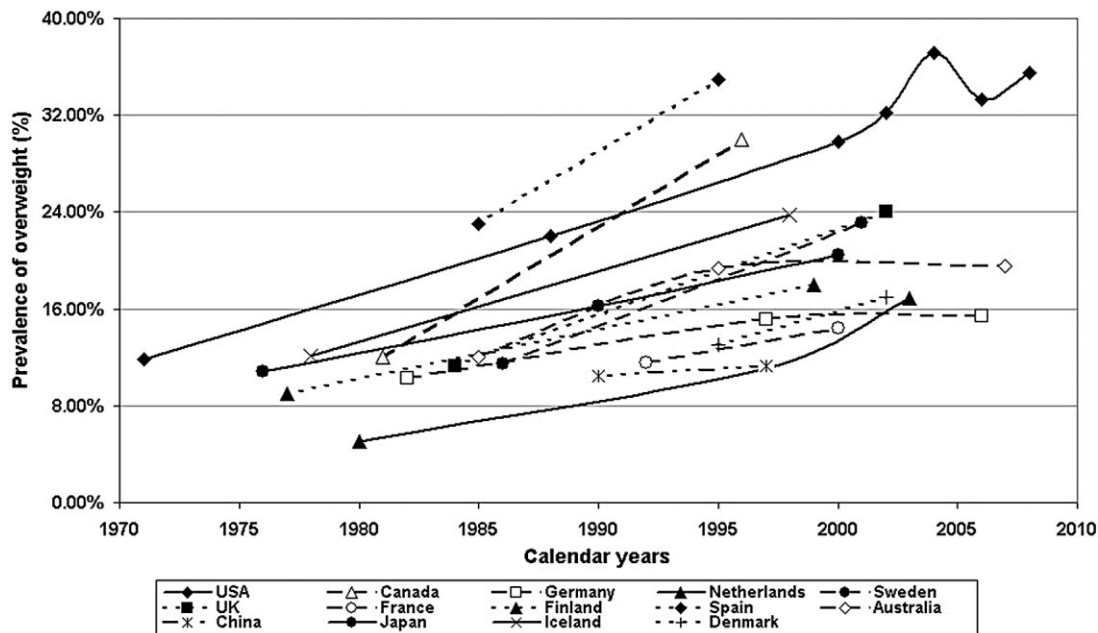

Figure 1 Secular changes in the prevalence of overweight among children aged 4–12 years (data from<sup>13,120–140</sup>).

particular on secular trends in childhood overweight and the timing of puberty since 1960–1970. A limiting factor for comparing secular changes in the timing of puberty across different studies lies in the use of different markers to characterize the timing of puberty. Furthermore, to date, no comparable international data are available on secular changes in the timing of puberty, as characterized by the various Tanner stages. Therefore, only evidence relating to age at menarche as an appropriately comparable marker of pubertal timing is presented.

Data from nationally representative surveys of US children shows that the prevalence of overweight increased dramatically from 1976–1980 to 1999–2004.<sup>11–13</sup> A recent review of secular trends in the number of overweight children concluded that the prevalence of childhood overweight has doubled or tripled between the early 1970s and the late 1990s in Australia, Canada, Finland, France, Germany, the United Kingdom, and the United States<sup>14</sup> (Figure 1). In addition, childhood overweight is becoming an increasing problem in many developing countries<sup>14</sup> (Figure 1).

Between the mid-19<sup>th</sup> and the mid-20<sup>th</sup> centuries, the average age at menarche decreased remarkably in both Western Europe and in the United States.<sup>15,16</sup> This trend paralleled increases in adult height in most European countries, with rates of around 10–30 mm per decade.<sup>17</sup> Since 1960–1970, i.e., before overweight emerged as a major health concern in children, this decrease in menarcheal age has leveled off, come to a halt, or even been reversed in European countries (Figure 2A). In the Netherlands, the median age at

menarche decreased rapidly between 1955 and 1965, followed by a decelerated decrease in 1980.<sup>18</sup> Examination of menarcheal age in Denmark between 1965–1966 and 1982–1983 revealed a decrease;<sup>19</sup> however, a subsequent study in 1996 demonstrated a halt in the secular trend toward earlier menarche.<sup>20</sup> In line with this finding, no secular trend toward earlier menarche was found from a nationwide representative sample of Finnish girls evaluated from 1979 to 1989.<sup>21</sup> Similarly, between 1965 and 1980, the mean age at menarche remained stable in Iceland, at around 13.5 years.<sup>22</sup> Furthermore, in the Netherlands, the median age at menarche remained unchanged from 1980 to 1997.<sup>23</sup> On the other hand, in the United Kingdom, the trend toward a younger age at menarche came to an end in girls in the 1950s, and a subsequently modest increase in the age at menarche was seen.<sup>24</sup> Similarly, in Belgium, the secular trend toward increasing age at menarche seems to have stopped in the early 1960s, even though a modest increase has been observed since then.<sup>25,26</sup> Furthermore, the trend toward a later age of menarche was recorded from 1977 to 1991 in Croatia.<sup>27</sup> In Sweden, a modest increase of 0.1 year per decade in mean age at menarche between 1986 and 2001 has been observed.<sup>28</sup>

Among white girls in the United States, a slight decrease (approximately  $-0.12$  years/decade)<sup>29–31</sup> or a substantial halt<sup>32–36</sup> in the mean age at menarche was observed since the 1960s. It is of interest that this halt or decrease in mean menarcheal age occurred during a period when the prevalence of overweight had just begun to increase.

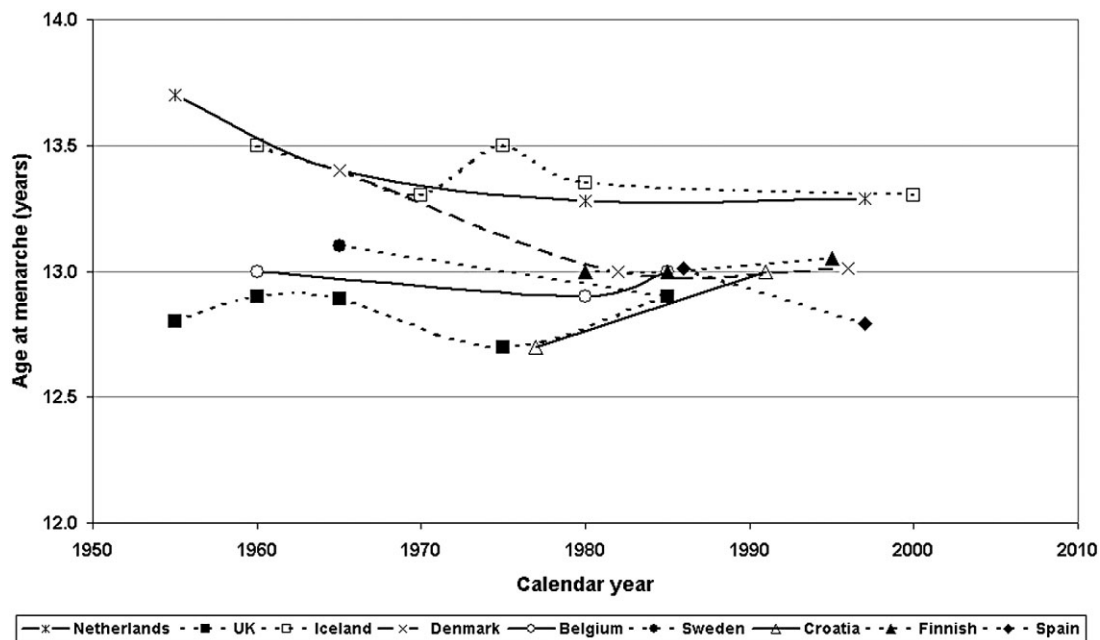

Figure 2A Secular changes in the age at menarche in countries without consistent decline (data from<sup>18–28,141,142</sup>).

During the same period, the secular trend toward a decrease in mean menarcheal age in the United States continued in black girls, from 12.48 years in 1963–1970 to 12.14 years in 1988–1994.<sup>30,33</sup> Similarly, secular trends towards an earlier menarcheal age were also observed in the following developing countries: Hong Kong,<sup>37</sup> Japan,<sup>38</sup> India,<sup>39</sup> and China<sup>40</sup> (Figure 2B). Since 1970–1980, the prevalence of childhood overweight has increased markedly in these countries. However, concurrent improve-

ments in living standards, hygiene, nutrition, and health care, which are also considered to result in earlier sexual maturation,<sup>41</sup> suggest that the increased prevalence of childhood overweight may not be the sole contributor to the decreased age of menarche observed in these developing countries.

In conclusion, the commonly implied parallel between an increase in the prevalence of overweight and a secular trend toward earlier timing of puberty is not a

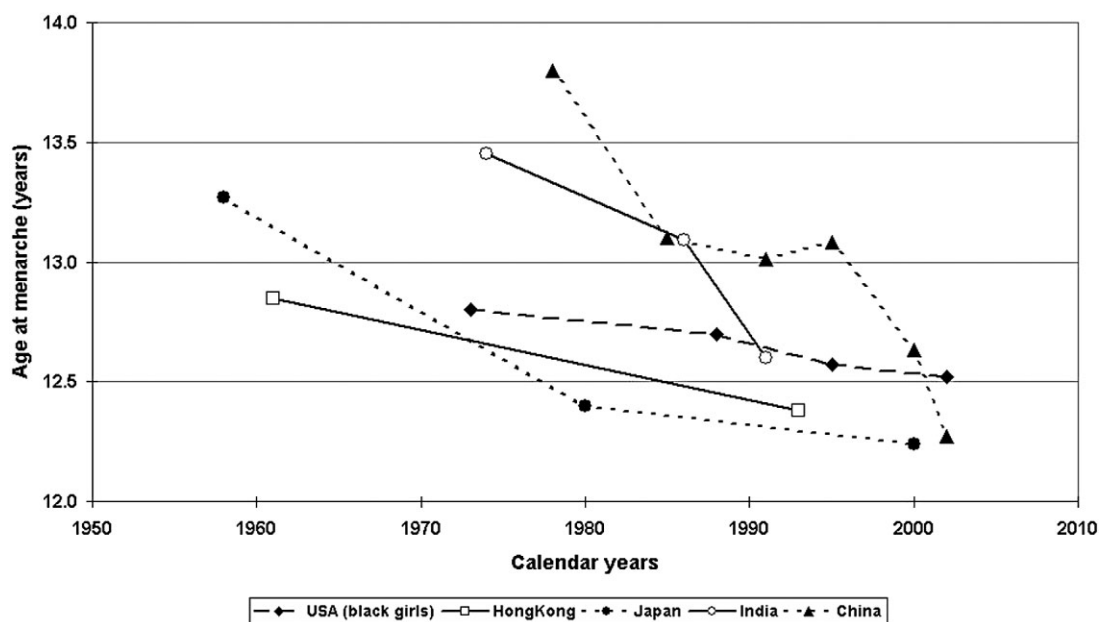

Figure 2B Secular changes in the age at menarche in countries with consistent decline (data from<sup>29–31,33–39,143,144</sup>).

universal finding, at least with regard to menarcheal age. This suggests that the contribution of childhood overweight to the timing of puberty may have been somewhat overemphasized.

### **Prepubertal body composition and the onset of puberty: longitudinal evidence**

Conclusions about the contribution of prepubertal body composition to the timing of puberty can only be drawn from longitudinal observational studies in humans. To date, a number of such studies have addressed this issue. However, most were conducted primarily in girls,<sup>8,42–46</sup> and only the onset of menarche, a relatively late stage of pubertal development, was addressed. These studies showed that higher levels of prepubertal body mass in girls are related to an earlier menarche. Table 1 presents all of the longitudinal studies that investigated the potential association of prepubertal body composition with pubertal timing in both boys and girls, or in boys only.

For both boys and girls, five longitudinal analyses<sup>47–51</sup> have demonstrated a role of body composition during prepuberty in the timing of puberty. Two of these studies focused on secondary sexual characteristics to characterize earlier (age at pubarche/thelarche,<sup>48</sup> Tanner stage 2 for genital and breast development<sup>51</sup>) and later (age at menarche,<sup>48</sup> advanced Tanner stages<sup>48,51</sup>) stages of pubertal development. In a retrospective analysis of 2,897 Australian adults, Mamun et al.<sup>51</sup> suggested a positive association between higher body mass index (BMI) at age 5 years and advanced pubertal stages at age 14 years. Using data from 259 Afro-Caribbean children, Boyne et al.<sup>48</sup> indicated that increased BMI/height during childhood was related to earlier age at pubarche, and higher fat mass at age 8 years was associated with a more advanced pubertal development. Two further studies used growth-related markers to determine the timing of puberty and to characterize earlier (age at take-off [ATO]<sup>47</sup>) and later (age at peak height velocity [APHV]<sup>47,50</sup>) pubertal stages. In 2001, He and Karlberg<sup>50</sup> showed that higher BMI in childhood was related to earlier APHV in 3,650 Swedish children. Similarly, Aks-glaede et al.<sup>47</sup> examined 156,835 Danish children and found that higher prepubertal BMI was associated with earlier ATO and APHV. In addition, an analysis of 215 children in the DONALD (Dortmund Nutritional and Anthropometric Longitudinally Designed) Study by Buyken et al.<sup>49</sup> considered both sexual- and growth-related pubertal markers to characterize earlier (ATO) and later (APHV and age at menarche) stages of pubertal development. In that study, prepubertal body composition in both genders was critical for later pubertal markers (APHV and age at menarche) but not for the

initiation of puberty (ATO), i.e., higher prepubertal BMI or fat mass index (FMI) was related to a shorter duration of puberty.

An association between higher prepubertal body mass and earlier timing of puberty was also suggested in two further longitudinal studies that included boys only: a higher prepubertal BMI was associated with an earlier age at voice break (assessed by the same experienced otorhinolaryngologist) in 463 Danish choir boys<sup>52</sup> or with an earlier APHV in a retrospective analysis of 1,520 British men.<sup>53</sup> By contrast, a recent prospective analysis by Lee et al.<sup>54</sup> has shown that boys with a higher BMI z-score trajectory during childhood experience their pubertal onset at a later age, which indicates that the association of prepubertal body mass with pubertal timing might not be the same in boys as it is in girls.

In summary, evidence regarding the association between prepubertal body composition and the timing of puberty consistently suggests that girls with higher body mass have an earlier timing of puberty with respect to both sexual-related maturation markers and the later growth-related markers, whereas the onset of the pubertal growth spurt was not influenced consistently. It is thus not clear whether the influence of prepubertal body composition is more relevant to onset-of-puberty markers in general or to puberty duration. Although, to date, most studies suggested similar associations in girls and boys, it cannot be precluded that the relevance of body composition in prepuberty for pubertal timing might differ for boys.

### **Potential mechanisms underlying the influences of body composition on the timing of puberty**

Body fat mass is an important indicator of nutritional status and is determined by genetic as well as pre- and postnatal environmental factors. Body fat- or body size-related peripheral hormones, such as leptin,<sup>55</sup> insulin,<sup>56</sup> and insulin-like growth factor 1 (IGF-1),<sup>56,57</sup> may mediate the body-composition-dependent variations of pubertal timing in the following ways: deprivation of IGF-1 (e.g., in malnutrition) delays the onset of puberty and slows the tempo of pubertal progression<sup>58</sup>; insulin resistance in obese subjects is associated with compensatory hyperinsulinemia and decreased levels of sex-hormone-binding globulin, resulting in increased sex steroid bioavailability<sup>59</sup>; and while leptin has been proposed to play a permissive role in the acceleration of puberty onset, it does not appear to be the central element or “trigger” in the timing of puberty.<sup>60</sup> In addition, aromatase, an enzyme largely expressed in adipose tissues, converts adrenal androgens to estrogenic sex hormones.<sup>61</sup> Although various determinants of the pubertal process and their network-like interrelations have yet to be identified and

**Table 1 Longitudinal data on prepupal body composition and the timing of puberty.**

| Reference                                                                     | Study type; no. of participants                                            | Predictors                                                                                                                                   | Outcomes                                                                                                                                               | Covariables                                                                                                                                                                                                            | Results                                                                                                                                                                                                                                                                                                                                                                                      | Conclusion                                                                                                                                                                                                                                                                    |
|-------------------------------------------------------------------------------|----------------------------------------------------------------------------|----------------------------------------------------------------------------------------------------------------------------------------------|--------------------------------------------------------------------------------------------------------------------------------------------------------|------------------------------------------------------------------------------------------------------------------------------------------------------------------------------------------------------------------------|----------------------------------------------------------------------------------------------------------------------------------------------------------------------------------------------------------------------------------------------------------------------------------------------------------------------------------------------------------------------------------------------|-------------------------------------------------------------------------------------------------------------------------------------------------------------------------------------------------------------------------------------------------------------------------------|
| Studies including both boys and girls – Aksgjaede et al. (2009) <sup>47</sup> | Prospective study; 156,835 Danish children (135,223 girls and 21,612 boys) | multiple pubertal markers evaluated<br>Categories of BMI-SDS at age 7 years (<-0.75, -0.75 to -0.25, -0.25 to +0.25, +0.25 to +0.75, >+0.75) | Pubertal growth spurt (ATO), PHV, puberty duration (PHV-ATO), and no menarche                                                                          | Unspecified                                                                                                                                                                                                            | Higher prepupal BMI was significantly associated with earlier ATO and earlier age at PHV                                                                                                                                                                                                                                                                                                     | The heavier the children were at age 7 years, the earlier they entered puberty.<br>Difference between sexes: no                                                                                                                                                               |
| Boyne et al. (2010) <sup>48</sup>                                             | Prospective study; 259 Afro-Caribbean children (140 girls and 119 boys)    | Birth size; height, weight, and BMI at ages 0.5, 2, 8, and 11 years; fat mass and lean mass at ages 8 and 11 years                           | Age at thelarche and pubarche (Tanner staging), age at menarche, and testicular volume (orchidometry performed every 6 months starting at age 8 years) | Unspecified                                                                                                                                                                                                            | Higher BMI from birth to 6 months was associated with earlier pubarche ( $r = 0.15$ , $P < 0.05$ ).<br>Higher height from 2 to 8 years was associated with earlier pubarche ( $r = 0.15$ , $P < 0.05$ ).<br>Higher fat mass at age 8 years was associated with a more advanced puberty at age 11 years ( $P < 0.05$ ). No association with age at menarche was found                         | Faster growth throughout childhood, especially with fat mass accretion, is associated with a more advanced puberty.<br>Difference between sexes: no                                                                                                                           |
| Buyken et al. (2009) <sup>49</sup>                                            | Prospective study; 215 German children (107 girls and 108 boys)            | z-scores of BMI, FMI, and FFMI 1 and 2 years before ATO                                                                                      | ATO, APHV, puberty duration (APHV-ATO), and age at menarche                                                                                            | Birth weight, gestational age, birth year, being firstborn, breastfeeding status, rapid weight gain, maternal overweight status, high maternal educational status, maternal age at birth, and smoking in the household | Girls with higher prepupal BMI and FMI tended to have an earlier ATO ( $P$ for trend = 0.1 and 0.05, respectively).<br>Prepubertal FFMI was not related to ATO.<br>Higher prepupal BMI and FMI were clearly associated with earlier APHV and shorter puberty duration in both sexes, and with earlier age at menarche in girls (girls: $P$ for trend < 0.0001–0.03; boys: $P = 0.01–0.046$ ) | Prepubertal body composition in boys and girls may not be critical for the initiation of the pubertal growth spurt but instead affects the progression of pubertal development, which results in earlier attainment of later pubertal stages.<br>Difference between sexes: no |

Table 1 Continued

| Reference                                                                | Study type; no. of participants                                          | Predictors                                                                                 | Outcomes                                                                                                                                        | Covariables                                                                                                                                                                                                                                                                           | Results                                                                                                                                                                                                                                                                                                                      | Conclusion                                                                                                                                                                                                                       |
|--------------------------------------------------------------------------|--------------------------------------------------------------------------|--------------------------------------------------------------------------------------------|-------------------------------------------------------------------------------------------------------------------------------------------------|---------------------------------------------------------------------------------------------------------------------------------------------------------------------------------------------------------------------------------------------------------------------------------------|------------------------------------------------------------------------------------------------------------------------------------------------------------------------------------------------------------------------------------------------------------------------------------------------------------------------------|----------------------------------------------------------------------------------------------------------------------------------------------------------------------------------------------------------------------------------|
| Mamun et al. (2009) <sup>51</sup>                                        | Retrospective study; 2,897 Australian adults (1,391 women and 1,506 men) | BMI z-score and overweight at age 5 years                                                  | Pubertal stages (Tanner staging of genital and breast development, and pubic hair) at 14 years, BMI and its categories at 21 years, no menarche | Maternal age at pregnancy, maternal educational attainment, birth weight, maternal prepregnancy BMI, maternal tobacco consumption during pregnancy, and breastfeeding Mediators: child's nutritional status, family meal patterns, TV watching and sports involvement at age 14 years | Higher BMI z-score at age 5 years was positively associated with more advanced stages of puberty at age 14 years (OR 1.88, 95%CI 1.53–2.31). Children who were overweight at age 5 years had a more than twofold greater risk to be in Tanner stage 5 at age 14 years than normal-weight children (OR 2.32, 95%CI 1.32–4.05) | Higher BMI and overweight at age 5 years predict more advanced pubertal stages at age 14 years. Difference between sexes: no                                                                                                     |
| Studies including both boys and girls – single pubertal marker evaluated |                                                                          |                                                                                            |                                                                                                                                                 |                                                                                                                                                                                                                                                                                       |                                                                                                                                                                                                                                                                                                                              |                                                                                                                                                                                                                                  |
| He and Karlberg (2001) <sup>50</sup>                                     | Prospective study; 3,650 Swedish children (1,796 girls and 1,854 boys)   | BMI at age 2 years, BMI at age 8 years, and BMI change between 2 and 8 years               | menarche                                                                                                                                        | Midparental height                                                                                                                                                                                                                                                                    | In both sexes, higher BMI gain in childhood was inversely related to APHV ( $-0.13 \leq \beta \leq -0.08$ , $P < 0.05$ ). BMI at age 2 years and BMI at age 8 years were inversely associated with APHV for boys only ( $\beta = -0.05$ , $P < 0.05$ )                                                                       | Faster growth in childhood is related to earlier timing of puberty. Difference between sexes: no (consistent difference)                                                                                                         |
| Studies including boys only – single pubertal marker evaluated           |                                                                          |                                                                                            |                                                                                                                                                 |                                                                                                                                                                                                                                                                                       |                                                                                                                                                                                                                                                                                                                              |                                                                                                                                                                                                                                  |
| Juul et al. (2007) <sup>52</sup>                                         | Prospective study; 463 Danish choir boys                                 | BMI-SDS at age 8 years                                                                     | Timing of voice break (assessed by the same experienced otorhinolaryngologist)                                                                  | Year of admission                                                                                                                                                                                                                                                                     | Boys with the highest BMI-SDS at age 8 years had an increased risk of early voice break (RR 1.74 [95%CI 1.14–2.65]) compared with boys with the lowest BMI-SDS                                                                                                                                                               | Boys with higher prepubertal BMI experienced voice break at an earlier age                                                                                                                                                       |
| Lee et al. (2010) <sup>54</sup>                                          | Prospective study; 401 US boys                                           | BMI trajectory created from BMI z-score at ages 2, 3, 4.5, 7, 9, 9.5, 10.5, and 11.5 years | Pubertal stage at age 11.5 years (Tanner stage)                                                                                                 | Income-to-needs ratio at age 2, race                                                                                                                                                                                                                                                  | Boys in the highest BMI trajectory had a greater relative risk of later puberty onset compared with boys in the lowest BMI trajectory (RR 2.63 [95%CI 1.05–6.61], $P = 0.04$ )                                                                                                                                               | In boys, a higher BMI z-score trajectory during childhood was associated with later puberty onset, which indicated that the relationship between body fat and timing of pubertal onset is not the same in boys as it is in girls |
| Sandhu et al. (2006) <sup>53</sup>                                       | Retrospective study; 1,520 British men                                   | Prepubertal BMI                                                                            | APHV                                                                                                                                            | Birth year                                                                                                                                                                                                                                                                            | A higher prepubertal BMI was related to an earlier APHV (per SD increase in child BMI: $-0.31$ years, 95%CI $-0.23$ to $-0.39$ , $P < 0.001$ )                                                                                                                                                                               | Boys with a higher prepubertal BMI experienced puberty at an earlier age                                                                                                                                                         |

Abbreviations: APHV, age at peak height velocity; ATO, age at take-off; BMI, body mass index; BMI-SDS, body mass index standard deviation score; FFMI, fat-free mass index; FMI, fat mass index; OR, odds ratio; PHV, peak height velocity.

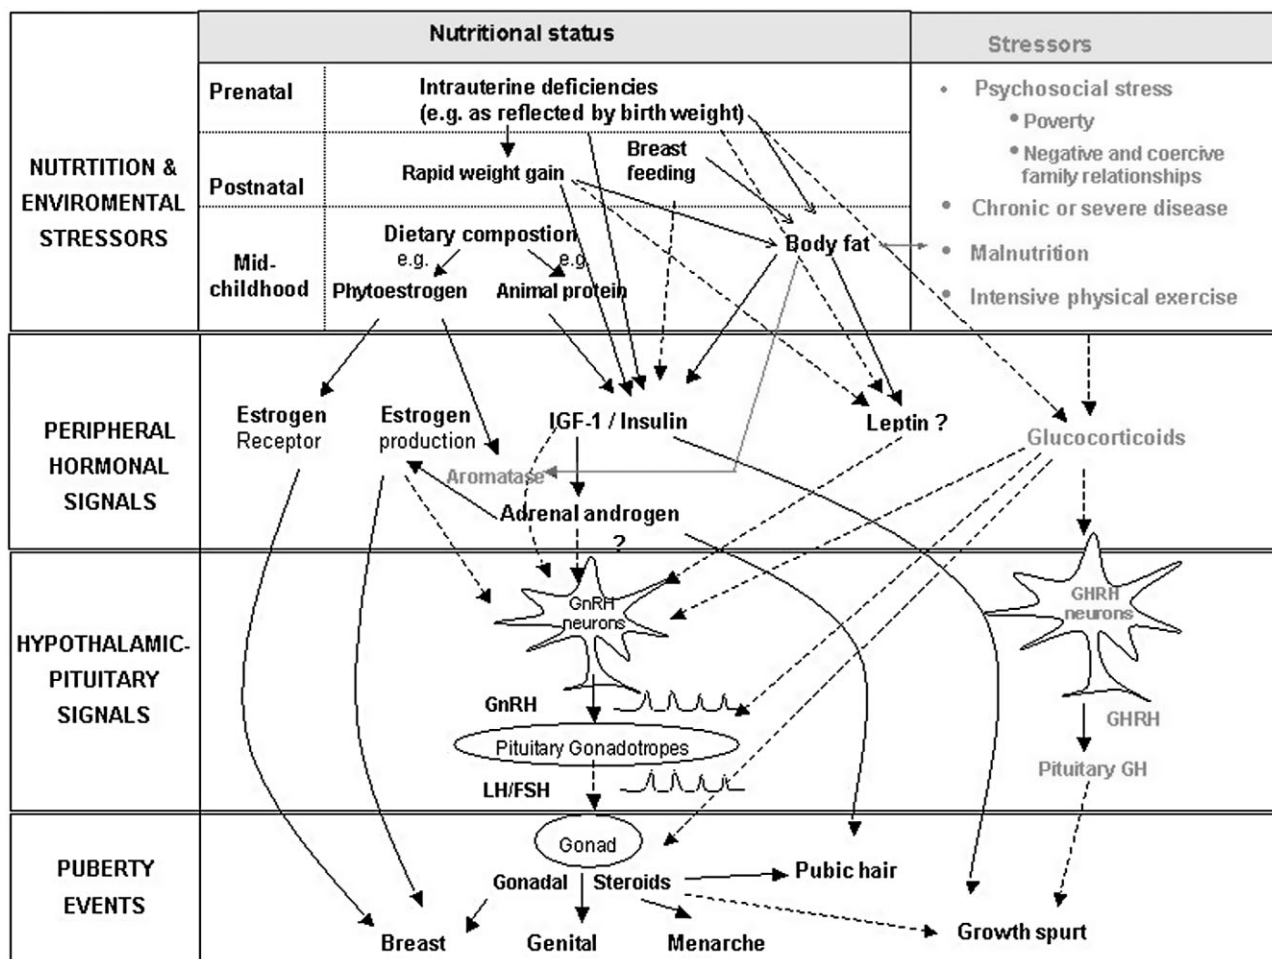

**Figure 3 Schematic illustration of potential pathways via peripheral hormonal and hypothalamic signaling through which nutritional and environmental stressors may influence pubertal markers.**

specified, it is clear that the amplification of pulsatile gonadotropin-releasing hormone (GnRH) secretion in the central nervous system is one of the key elements required for the onset of puberty.<sup>62,63</sup> In vitro and in vivo experiments suggest that IGF-1, insulin, leptin, and sex steroids may exert their effects on the reproductive axis through influences on the secretion and the expression of GnRH by hypothalamic neurons (Figure 3).

### NUTRITION AND TIMING OF PUBERTY

Besides body composition, the role of nutrition, which is an important lifestyle factor, in the timing of puberty has been acknowledged increasingly. The influence of nutrition in midchildhood on the onset of puberty has been addressed variously. Furthermore, both pre- and perinatal exposures have been identified as potential determinants of pubertal timing in a number of studies.

### Nutrition in midchildhood

To date, a number of prospective observational studies have investigated the potential association of different nutrient/food intakes in midchildhood with the timing of puberty. These studies are summarized in Table 2 and reviewed in the following section. Only four<sup>64-67</sup> of the above studies have prospectively analyzed the relevance of nutrition in midchildhood for the timing of puberty in both boys and girls. The other studies<sup>68-78</sup> were conducted in girls only, and most<sup>70-78</sup> of them focused on only one pubertal marker, the timing of menarche, which represents a relatively late stage of reproductive development. In addition, the prepubertal time window of 9–15 years of age analyzed in many studies<sup>68-77</sup> may have actually encompassed the onset of early pubertal signs.

*Energy intake (girls only).* Since excess body fat mass results from long-term energy imbalance, the role of

Table 2 **Prospective data on prepubertal nutrition and the timing of puberty.**

| Reference                                                                   | Study type; no. of participants                                              | Predictors                                                                                                                      | Outcomes                                                                                            | Assessment method                                                         | Covariables                                                                                                                                                                                                                                | Results                                                                                                                                                                                                                                                                                                                                                                                                                                                                                                                                                                                                            | Conclusion                                                                                                                                                                 |
|-----------------------------------------------------------------------------|------------------------------------------------------------------------------|---------------------------------------------------------------------------------------------------------------------------------|-----------------------------------------------------------------------------------------------------|---------------------------------------------------------------------------|--------------------------------------------------------------------------------------------------------------------------------------------------------------------------------------------------------------------------------------------|--------------------------------------------------------------------------------------------------------------------------------------------------------------------------------------------------------------------------------------------------------------------------------------------------------------------------------------------------------------------------------------------------------------------------------------------------------------------------------------------------------------------------------------------------------------------------------------------------------------------|----------------------------------------------------------------------------------------------------------------------------------------------------------------------------|
| Studies including both boys and girls – multiple pubertal markers evaluated |                                                                              |                                                                                                                                 |                                                                                                     |                                                                           |                                                                                                                                                                                                                                            |                                                                                                                                                                                                                                                                                                                                                                                                                                                                                                                                                                                                                    |                                                                                                                                                                            |
| Cheng et al. (2010) <sup>64</sup>                                           | Prospective study; 222 German children (119 girls and 103 boys) DONALD Study | Nutrient-density-based NQI, and food group and nutrient-based RC-DQI at 2 and 3 years before the onset of pubertal growth spurt | ATO                                                                                                 | 3-day weighed dietary records                                             | Birth weight, full breastfeeding for at least 4 months, rapid weight gain between birth and 24 months, physical activity (for NQI), maternal overweight, maternal education, smoking status of household, and prepubertal body composition | Children with lower dietary quality indicated by lower NQI scores entered puberty approximately 0.4 years earlier than children with higher NQI scores (ATO in lower and higher NQI categories were 9.2 years [95%CI 9.0–9.4] and 9.6 years [95%CI 9.4–9.9], $P = 0.02$ ), independently of prepubertal body composition. A similar association of the RC-DQI with ATO was largely explained by differences in baseline energy intakes                                                                                                                                                                             | Children with lower dietary quality appear to enter puberty at an earlier age, independently of prepubertal body composition                                               |
| Cheng et al. (2010) <sup>65</sup>                                           | Prospective study; 227 German children (119 girls and 108 boys) DONALD Study | Dietary isoflavones, urinary isoflavones, and dietary fiber at 1 and 2 years before ATO                                         | ATO, APHV, age at menarche/voice break, pubertal stage for breast (B2) and gonadal (G2) development | 3-day weighed dietary records. Urinary measurement: 24-h urine collection | Birth weight, maternal overweight, maternal education, smoking in the household, body composition and z-score of energy intake in childhood                                                                                                | Girls whose isoflavone intake was in the highest tertile experienced their Tanner stage 2 for breast development approximately 0.7 years later and reached PHV approximately 0.6 years later than girls whose intake was in the lowest tertile (age at B2 was 10.7 (10.4–10.9) versus 10.0 (9.7–10.3) years ( $P = 0.04$ ), and age at PHV was 11.9 (11.6–12.2) versus 11.3 (11.0–11.6) years ( $P = 0.04$ )). In boys, no association between dietary isoflavones and pubertal markers was found. In both girls and boys, urinary isoflavones and dietary fiber intakes were not associated with pubertal markers | Girls, but not boys, with higher prepubertal isoflavone intakes appear to enter puberty at a later age. Fiber intake was not relevant for pubertal timing in girls or boys |



|                                     |                                                                            |                                                                                                                                                                                                   |                                                                                                                                     |                                                                           |                                                                                                                                                                                             |                                                                                                                                                                                                                                                                                                                                                                                                                                                                                                                                                                                                                                                                                                                                                                                                                                                                                     |                                                                                                                            |
|-------------------------------------|----------------------------------------------------------------------------|---------------------------------------------------------------------------------------------------------------------------------------------------------------------------------------------------|-------------------------------------------------------------------------------------------------------------------------------------|---------------------------------------------------------------------------|---------------------------------------------------------------------------------------------------------------------------------------------------------------------------------------------|-------------------------------------------------------------------------------------------------------------------------------------------------------------------------------------------------------------------------------------------------------------------------------------------------------------------------------------------------------------------------------------------------------------------------------------------------------------------------------------------------------------------------------------------------------------------------------------------------------------------------------------------------------------------------------------------------------------------------------------------------------------------------------------------------------------------------------------------------------------------------------------|----------------------------------------------------------------------------------------------------------------------------|
| Günther et al. (2010) <sup>66</sup> | Prospective study; 112 German children (57 girls and 55 boys) DONALD Study | Protein intake, animal protein intake, and vegetable protein intake at ages 1, 1.5–2, 3–4, and 5–6 years; protein intake estimated from 24-h urinary nitrogen excretion at ages 3–4 and 5–6 years | ATO, APHV, age at menarche/voice break                                                                                              | 3-day weighed dietary records. Urinary measurement: 24-h urine collection | Sex, birth weight, breastfeeding, rapid weight gain between birth and age 2 years, maternal overweight, parental education, total energy intake, fat intake, fiber intake, prepupal FMI SDS | According to the life-course plots, total or animal protein intake at age 5–6 years and vegetable protein intake at age 3–4 years were of particular importance for pubertal timing ( $P \leq 0.06$ ). A higher total or animal protein intake at age 5–6 years was related to an earlier ATO. In the highest tertile (T) of animal protein intake, ATO occurred 0.6 years earlier than in the lowest tertile (T <sub>1</sub> : 9.6 [95%CI 9.4–9.9] vs. T <sub>3</sub> : 9.0 [95%CI 8.7–9.3] years; $P = 0.003$ ). Similar findings were seen for APHV ( $P = 0.001$ ) and the age at menarche/voice break ( $P = 0.02$ ). Children whose dietary intake of vegetable protein was in the highest tertile at age 3–4 years reached their ATO, APHV, and menarche/voice break approximately 0.5 years later than children whose intake was in the lowest tertile ( $P = 0.02–0.04$ ). | Animal and vegetable protein intake in midchildhood might be differentially related to the timing of puberty               |
| Remer et al. (2010) <sup>67</sup>   | Prospective study; 109 German children (55 girls and 54 boys) DONALD Study | Animal protein intake and AA 1 and 2 years before ATO                                                                                                                                             | ATO, APHV, age at menarche and age at voice break, age at Tanner stage 2 for breast and genital development (B2/G2), and pubic hair | 3-day weighed dietary records. Urinary measurement: 24-h urine collection | Sex, FMI at baseline, total energy intake SDS, urinary volume related to body surface area, gestational age, birth weight, breastfeeding $\geq 2$ weeks, and maternal overweight            | Animal protein intake prior to puberty was negatively associated with ATO and APHV ( $P < 0.05$ ) and tended to be negatively associated with age at menarche/voice break ( $P = 0.07$ ); these associations were independent of AA. Higher AA secretion predicted earlier ages at pubic hair development ( $P < 0.0001$ ) and B2/G2 ( $P = 0.009$ ), as well as a shorter pubertal growth acceleration period ( $P = 0.001$ ), independently of animal protein intake                                                                                                                                                                                                                                                                                                                                                                                                              | A higher animal protein intake may be involved independently of AA in an earlier attainment of pubertal growth development |

Table 2 Continued

| Reference                                                                                                                | Study type; no. of participants   | Predictors                                                                                                                                                                                                                       | Outcomes                                                                                                                                                             | Assessment method         | Covariables                                                           | Results                                                                                                                                                                                                                                                                                                                                                                                                                                                                                                                                                                                                                                                                                                                                                          | Conclusion                                                                                                        |
|--------------------------------------------------------------------------------------------------------------------------|-----------------------------------|----------------------------------------------------------------------------------------------------------------------------------------------------------------------------------------------------------------------------------|----------------------------------------------------------------------------------------------------------------------------------------------------------------------|---------------------------|-----------------------------------------------------------------------|------------------------------------------------------------------------------------------------------------------------------------------------------------------------------------------------------------------------------------------------------------------------------------------------------------------------------------------------------------------------------------------------------------------------------------------------------------------------------------------------------------------------------------------------------------------------------------------------------------------------------------------------------------------------------------------------------------------------------------------------------------------|-------------------------------------------------------------------------------------------------------------------|
| Studies including girls only – multiple pubertal markers evaluated<br>Berkey et al. <sup>a</sup><br>(2000) <sup>68</sup> | Prospective study; 67 US girls    | Energy intake and intakes of animal protein, vegetable protein, and total fat at ages 1, 2, 3, 4, 5, 6, 7, 8, and 9 years                                                                                                        | Age at menarche, APHV, peak height growth velocity                                                                                                                   | Dietary history interview | Age, energy intake                                                    | Girls aged 3–5 years with 1 SD higher vegetable protein (approximately 3 g/day) experienced menarche 0.87 years later ( $P < 0.05$ ).<br>Girls aged 3–5 years with 1 SD higher animal protein (approximately 8 g/day) experienced menarche 0.63 years earlier ( $P < 0.05$ ).<br>Girls aged 1–2 years with 1 SD higher dietary fat intake (approximately 8 g/day) had their APHV 0.63 years earlier ( $P < 0.05$ )                                                                                                                                                                                                                                                                                                                                               | Intakes of protein and fat in childhood are associated with pubertal timing                                       |
| de Ridder et al. <sup>a</sup><br>(1991) <sup>69</sup>                                                                    | Prospective study; 63 Dutch girls | Energy intake, fiber intake (grain fiber intake, vegetable fiber intake, fruit fiber intake), total protein intake, animal protein intake, vegetable protein intake, carbohydrate intake, and fat intake at ages 10 and 12 years | Breast development stage, plasma concentrations of gonadotropins, and plasma concentrations of estradiol at age 9–13 years (measured twice a year from 1986 to 1987) | 7-day food record         | Energy intake, polysaccharides, height, and time of 7-day food record | Girls with a lower grain fiber intake at age 10 years had a lower stage of breast development at age 11–12 years ( $P < 0.05$ ).<br>Girls with a lower intake of dietary grain fiber at age 10 years had significantly higher plasma concentrations of gonadotropins and estradiol at age 12–13 years compared with girls with a higher intake of fiber ( $P < 0.05$ ).<br>No association was found between intake of vegetable and fruit fiber and stage of breast development.<br>Girls with a higher vegetable protein intake at age 10 years had a lower stage of breast development at age 11.5 years ( $P < 0.05$ ).<br>Energy intake, total protein intake, dietary fat, or carbohydrate intake were not significantly associated with breast development | Diet rich in vegetable products, especially fiber, may be associated with physical and hormonal sexual maturation |

Studies including girls only – age at menarche used as pubertal marker

| Author (Year)                                      | Study Design       | Population                                                                                                       | Exposures                                                                                                                                                                                                            | Outcomes                                        | Key Findings                                                  | Limitations                                                                                              |
|----------------------------------------------------|--------------------|------------------------------------------------------------------------------------------------------------------|----------------------------------------------------------------------------------------------------------------------------------------------------------------------------------------------------------------------|-------------------------------------------------|---------------------------------------------------------------|----------------------------------------------------------------------------------------------------------|
| Maclure et al. <sup>a</sup> (1991) <sup>72</sup>   | Prospective study; | 213 US girls                                                                                                     | Intakes of total fat, specific fatty acids, cholesterol, protein, sucrose, carbohydrates, fiber, and vitamins at age 10 years                                                                                        | Relative risk of menarche before age 12.5 years | Semiautomated food frequency questionnaire (parents reported) | Linear regression of the log of nutrient intake on the log of energy intake, and height, weight, and BMI |
| Merzenich et al. <sup>a</sup> (1993) <sup>73</sup> | Prospective study; | 261 German girls                                                                                                 | Fat intake, protein intake, carbohydrate intake at age 8–15 years                                                                                                                                                    | Relative risk of menarche                       | 7-day food record                                             | Energy intake                                                                                            |
| Meyer et al. <sup>a</sup> (1990) <sup>74</sup>     | Prospective study; | 109 Canadian girls                                                                                               | Energy intake, intakes of protein, lipid, and carbohydrate at age 9–12 years                                                                                                                                         | Age at menarche                                 | 3-day dietary record (including 1 weekend day)                | Age                                                                                                      |
| Moisan et al. <sup>a</sup> (1990a) <sup>75</sup>   | Prospective study; | 2,299 Canadian girls (911 girls had reached menarche and 1,388 were still premenarcheal at the end of follow-up) | Energy intake, proteins, carbohydrates, lipids, SFA, MUFA, PUFA, cholesterol, calcium, iron, phosphorus, crude fiber, and vitamins A, B6, B12, C, D, E, folacin, niacin, riboflavin, and thiamine at age 10–13 years | Age at menarche                                 | 3-day dietary record                                          | Girl's age and the mother's age at the beginning of the study                                            |

Age at menarche was not associated with intake of energy or energy-adjusted intake of protein or carbohydrate. Higher intake of saturated fatty acids was associated with later menarche (RR 0.7 [95%CI 0.4–1.2] for highest vs. lowest category,  $P = 0.02$ ). Higher vitamin A intake was associated with earlier age at menarche (RR 1.3 [95%CI 0.7–2.3] for highest vs. lowest category,  $P = 0.002$ ). Higher intake of  $\omega$ -3 fatty acids was associated with earlier age at menarche (RR 2.7 [95%CI 1.6–4.6] for highest vs. lowest category,  $P = 0.008$ )

Increased energy-adjusted fat intake was associated with higher risk of menarche (RR 2.1 [95%CI 1.1–4.0], highest vs. lowest quartile). Energy intake and intakes of carbohydrate and protein were not associated with age at menarche

Dietary energy intake at age 9–12 years was not associated with age at menarche. Intakes of carbohydrate, fat, and protein at age 9–12 years were not associated with age at menarche

A higher vitamin C intake at age 10–13 years was related to earlier age at menarche. Dietary fiber and protein intakes were not associated with age at menarche

Nutritional factors in childhood are associated with age at menarche

Fat intake in childhood is associated with age at menarche

Apart from extreme situations, prepubertal diet does not appear to be an important determinant of age at menarche

Diet was not associated with age at menarche

Table 2 Continued

| Reference                                         | Study type; no. of participants                                                       | Predictors                                                                                                                                                                                                                                                                                                                                                                                                                           | Outcomes                                                                                                                        | Assessment method                                                   | Covariables                  | Results                                                                                                                                                                                                                                                                                                                                                                                                                                                                                                                                                                                                                                                                                                                                                                                                              | Conclusion                                                                               |
|---------------------------------------------------|---------------------------------------------------------------------------------------|--------------------------------------------------------------------------------------------------------------------------------------------------------------------------------------------------------------------------------------------------------------------------------------------------------------------------------------------------------------------------------------------------------------------------------------|---------------------------------------------------------------------------------------------------------------------------------|---------------------------------------------------------------------|------------------------------|----------------------------------------------------------------------------------------------------------------------------------------------------------------------------------------------------------------------------------------------------------------------------------------------------------------------------------------------------------------------------------------------------------------------------------------------------------------------------------------------------------------------------------------------------------------------------------------------------------------------------------------------------------------------------------------------------------------------------------------------------------------------------------------------------------------------|------------------------------------------------------------------------------------------|
| Moisan et al. <sup>a</sup> (1990b) <sup>76</sup>  | Prospective study; 666 Canadian girls (333 menarcheal girls, 333 premenarcheal girls) | Energy intake, protein, carbohydrates, lipids, SFA, MUFA, PUFA, cholesterol, calcium, iron, phosphorus, crude fiber, and vitamins A, B6, B12, C, D, E, folacin, niacin, riboflavin, and thiamine at age 9.5–12.5 years                                                                                                                                                                                                               | Ratio of the odds of having reached menarche in a given quartile of one nutrient to the odds among those in the lowest quartile | 3-day dietary record                                                | Age, energy intake           | Girls with higher energy intake were likely to experience menarche earlier than those with lower energy intake (OR 1.5 [95% CI 0.9–2.3] for highest vs. lowest quartile). Fiber intake was not associated with age at menarche. Girls with higher MUFA intake were likely to experience menarche later (OR 0.6 [95% CI 0.4–0.9] for highest vs. lowest quartile). Girls with higher dietary vitamin A experienced menarche later (OR 0.5 [95% CI 0.3–0.8] for highest vs. lowest quartile).                                                                                                                                                                                                                                                                                                                          | Diet in childhood was associated with age at menarche                                    |
| Petridou et al. <sup>a</sup> (1996) <sup>77</sup> | Prospective study; 345 Greek girls                                                    | Total energy intake, intakes of SFA, MUFA, PUFA, protein, and carbohydrates at age 9–16 years                                                                                                                                                                                                                                                                                                                                        | Risk of menarche                                                                                                                | Interviewer-administered FFQ                                        | Total energy intake          | Girls with higher total energy intake experienced menarche later than girls with lower total energy intake (an increase of 1 SD energy intake (~677 kcal) is the rate ratio 0.87 [95% CI 0.74–1.02]). Energy-adjusted macronutrients were not associated with age at menarche                                                                                                                                                                                                                                                                                                                                                                                                                                                                                                                                        | An alteration of energy balance in childhood could delay age at menarche                 |
| Rogers et al. (2010) <sup>78</sup>                | Prospective study; 3,298 British girls                                                | Nutrients at ages 3, 7, and 10 years: energy, total fat, SFA, MUFA, PUFA, starch, sugar, total protein, animal protein, vegetable protein, NSP (a measure of fiber intake), iron, calcium, zinc, magnesium, and carotene. Foods at ages 3, 7, and 10 years: intakes of fruit, vegetables, total fish, oily fish, meat, dairy products, soy meat/textured vegetable protein, and legumes, and whether the child ate a vegetarian diet | Age at menarche yes/no at age 12 years 8 months (median age in this cohort)                                                     | FFQ at ages 3 and 7 years, and 3-day dietary record at age 10 years | Height and BMI at 7–10 years | After adjustment for body size, the association of higher energy intakes with the early occurrence of menarche was removed. Total and animal protein intakes were positively associated with age at menarche (OR for 1 SD increase in protein 1.17 [95% CI 1.07–1.28]). Higher PUFA intakes were positively associated with early occurrence of menarche (OR for 1 SD increase in PUFA 1.11 [95% CI 1.02–1.21]). Intakes of magnesium and zinc were associated with the early occurrence of menarche (OR for 1 SD increase in magnesium 1.09 [95% CI 1.00–1.19], for 1 SD increase in Zn 1.10 [95% CI 1.01–1.21]). Meat intake at age 7 years was strongly positively associated with reaching menarche by 12 years 8 months (OR 1.57 [95% CI 1.03–2.37] in the highest vs. the lowest category of meat consumption) | Higher intakes of protein and meat in early to midchildhood may lead to earlier menarche |

|                                                         |                                       |                                                                                                                                                                                                                                                                                                                                                                                                                                                                                                            |                  |                       |                                                                                                                                                                 |                                                                                                                                                                                                                                                                                                                                                                                                                                                                                                                                                                                             |                                                                                          |
|---------------------------------------------------------|---------------------------------------|------------------------------------------------------------------------------------------------------------------------------------------------------------------------------------------------------------------------------------------------------------------------------------------------------------------------------------------------------------------------------------------------------------------------------------------------------------------------------------------------------------|------------------|-----------------------|-----------------------------------------------------------------------------------------------------------------------------------------------------------------|---------------------------------------------------------------------------------------------------------------------------------------------------------------------------------------------------------------------------------------------------------------------------------------------------------------------------------------------------------------------------------------------------------------------------------------------------------------------------------------------------------------------------------------------------------------------------------------------|------------------------------------------------------------------------------------------|
| Kissinger and Sanchez <sup>a</sup> (1987) <sup>70</sup> | Prospective study; 230 white US girls | Nutrients at age 9–15 years: energy intake, carbohydrate, protein, fat, vitamin A, thiamine, riboflavin, niacin, vitamin C, calcium, phosphorus, potassium, iron, and vitamin B12.<br>Food groups at age 9–15 years:<br>1) meat, poultry, fish, and seafood<br>2) dairy products<br>3) meat analogues<br>4) fresh and canned fruits<br>5) nuts<br>6) grains<br>7) vegetables<br>8) beans and other legumes<br>9) candy and popcorn<br>10) snacks<br>11) soups and stews<br>12) salads<br>13) miscellaneous | Age at menarche  | Multiple 24-h recalls | None                                                                                                                                                            | A significant association was found between meat intake and age at menarche, resulting in a 6-month earlier age of menarche among meat users compared with vegetarians ( $P < 0.025$ ). Girls whose intake of carbohydrate, thiamine, and iron was in the upper quartile experienced menarche 7–8 months later than those whose intake of these nutrients was in the lowest quartile ( $P < 0.05$ ). Total intake of protein or fat was not associated with age at menarche                                                                                                                 | A vegetarian dietary lifestyle is an important factor in retarding the onset of menarche |
| Koo et al. <sup>a</sup> (2002) <sup>71</sup>            | Prospective study; 637 Canadian girls | Fiber intake, fat intake, and fatty acids intake at age 6–14 years                                                                                                                                                                                                                                                                                                                                                                                                                                         | Risk of menarche | 162-item FFQ          | Age at entry, time-dependent age at entry, body weight, birth weight, log of energy intake, maternal age at menarche, and paternal occupational prestige rating | A higher energy-adjusted intake of dietary fiber was associated with a lower risk of (i.e., a later age at) menarche (relative hazard ratio 0.54 [95%CI 0.31–0.94] for highest vs. lowest quartile, $P = 0.027$ ). A higher energy-adjusted intake of cellulose was associated with a later age at menarche (relative hazard ratio 0.45 [95%CI 0.26–0.76] for highest vs. lowest quartile, $P = 0.009$ ). Increased intake of energy-adjusted animal fat was inversely associated with menarche (relative hazard ratio 0.52 [95%CI 0.32–0.85] for highest vs. lowest quartile, $P = 0.03$ ) | Premenarcheal dietary intake can influence age at menarche                               |

**Abbreviations:** AA, adrenal androgen; APHV, age at peak height velocity; ATO, age at take-off; BMI, body mass index; FFQ, food frequency questionnaire; FMI, fat mass index; MUFA, monounsaturated fatty acids; NQI, nutritional quality index; NSP, a measure of fiber intake; PHV, peak height velocity; PUFA, polyunsaturated fatty acids; RC-DQI, revised children's diet quality index; RR, relative risk; SD, standard deviation; SDS, standard deviation score; SFA, saturated fatty acids.

<sup>a</sup> The time window of diet assessment potentially encompasses the onset of early pubertal signs (e.g., Tanner stage 2).

energy intake has been analyzed in numerous prospective observational studies in girls.<sup>68,69,72-74,76-78</sup>

No association between energy intake in childhood and timing of menarche<sup>68,72-74,78</sup> or stage of breast development<sup>69</sup> was observed in six studies of US and European girls. Furthermore, Moisan et al.<sup>76</sup> reported an association between higher energy intake at age 9.5–12.5 years and earlier age at menarche in 666 Canadian girls, while Petridou et al.<sup>77</sup> found higher energy intake to be related to later menarcheal age in 345 Greece girls aged 9–16 years.

In summary, the available evidence does not suggest a consistent association between energy intake levels in prepuberty and menarcheal age. In addition, due to general methodological problems in assessing energy intake, as well as the inconsistent adjustment for under-reporting and body composition, it is difficult to compare these studies.

*Fat intake (girls only).* Various prospective observational studies in girls have examined whether fat intake, due to its potential influence on estrogen metabolism,<sup>79</sup> is related to age at menarche. Several of these studies<sup>69,70,74,77</sup> found no association, while others<sup>68,71-73,76,78</sup> reported associations between dietary fat intake and age at menarche.

Four studies<sup>68,72,73,78</sup> found higher intakes of total fat or polyunsaturated fatty acids (PUFA) were related to earlier menarcheal age. Using data from 63 girls in the United States, Berkey et al.<sup>68</sup> suggested that total fat intake at age 1–2 years was related to an earlier APHV. Similarly, Merzenich et al.<sup>73</sup> reported that higher levels of total fat intake at age 7–14 years were associated with earlier age at menarche. In addition, Maclure et al.<sup>72</sup> suggested that a higher intake of omega-3 fatty acids at age 10 years was related to earlier menarche in 213 US girls. Similarly, Rogers et al.<sup>78</sup> observed an increased risk of early occurrence of menarche in 3,298 British girls with higher PUFA intakes at ages 3 and 7 years.

By contrast, higher intakes of saturated fatty acids, monounsaturated fatty acids (MUFA), or animal fat were linked to a later age at menarche. Maclure et al.<sup>72</sup> reported that higher intakes of saturated fatty acids in 213 US girls aged 10 years were associated with a decreased risk of early menarche. Similar associations with higher MUFA intake at age 9.5–12.5 years were reported by Moisan et al.<sup>76</sup> in 666 Canadian girls. Furthermore, Koo et al.<sup>71</sup> analyzed data from 637 Canadian girls aged 6–14 years and suggested that higher animal fat intakes were related to a later age at menarche.

Taken together, these findings suggest that dietary fat intake may be implicated in the timing of menarcheal age. However, the pattern with which different fatty acids contribute to pubertal timing is difficult to interpret, and mechanistic explanations are lacking. This

may reflect the fact that, in the 1990s, numerous studies analyzed the relevance of dietary fat intakes for various health-relevant outcomes. Emerging evidence on the relevance of prepubertal body composition for pubertal timing thus may have stimulated analyses on the relevance of dietary fat intake for pubertal development despite the absence of specific mechanistic considerations.

*Fiber intake (girls and boys).* A recent longitudinal study suggests that higher prepubertal estrogen levels predict shorter pubertal growth spurt in both boys and girls.<sup>80</sup> Age at menarche occurred earlier in girls with higher prepubertal estrogen levels.<sup>80</sup> Dietary fiber intake has been proposed to influence pubertal development by reducing the availability of circulating estrogen levels via a number of potential mechanisms. These include the following: 1) a reduced deconjugation of estrogen conjugates,<sup>81</sup> resulting in a reduced uptake of free estrogens via the enterohepatic circulation; 2) increased fecal estrogen excretion by binding of (deconjugated) estrogens<sup>82</sup>; 3) reduced bioavailability of estradiol due to increased hepatic expression of sex hormone-binding globulin<sup>83</sup>; and 4) direct action on the maturation or secretion of the hypothalamus-pituitary-gonad system.<sup>69</sup>

To date, two prospective observational studies in girls<sup>69,71</sup> have reported a delayed menarcheal age in relation to higher fiber intakes in childhood. Koo et al.<sup>71</sup> reported a clear risk reduction of 0.54-fold for early menarche among 637 Canadian girls whose fiber intake at age 6–14 years was in the highest quartile (>25.5 g/day) in comparison to girls with fiber intakes in the lowest quartile (≤18.2 g/day). The major contributors to this association were cellulose and insoluble fiber. Similarly, using data from 63 Dutch girls, de Ridder et al.<sup>69</sup> reported a later age at menarche and later breast development in those with higher intakes of grain fiber at age 10 years. In addition, girls with lower intakes of grain fiber (<5.5 g/day) had higher plasma concentrations of gonadotropins and estradiol compared to girls with higher intakes of grain fiber (<7.7 g/day).

However, three further studies did not confirm these associations. Moisan et al.<sup>75</sup> did not find an association between fiber intakes at age 10–13 years and age at menarche in 2,299 Canadian girls, which was confirmed by a later report from the same group of investigators in a case-control analysis of 666 girls.<sup>76</sup> Using data from the DONALD Study, Cheng et al.<sup>65</sup> analyzed the potential influence of fiber intake on the timing of puberty in 227 German girls and boys using various pubertal markers indicative of both earlier and later stages of pubertal development. These included markers of sexual maturation (Tanner stage 2 for breast development/testicular volume, and age at menarche/voice break) and growth

development (ATO and APHV). Neither total fiber intake nor fiber intake from different sources was related to any pubertal markers in either girls or boys.

These contrasting findings may be related, in part, to the fiber intake levels, which were particularly high in the two studies reporting an association of fiber intake with menarcheal age. On the other hand, since grain fiber is the major source of dietary isoflavones in Western diets,<sup>84</sup> the association of fiber intake – mainly stemming from grains – with the timing of puberty may, to some extent, reflect an effect of dietary isoflavones.

*Dietary isoflavone intake (girls and boys).* Isoflavones, which are structurally and functionally similar to endogenous estrogens,<sup>85</sup> have been proposed to be relevant for pubertal development thanks to two factors: 1) their inhibitory actions on the activity of aromatase<sup>86</sup> (the rate-limiting enzyme that converts androstenedione and testosterone to estrone and estradiol, respectively<sup>87</sup>) and 17 $\beta$ -hydroxysteroid dehydrogenase<sup>88</sup> (which catalyzes the interconversion of the relatively inactive 17 $\beta$ -keto steroids to active 17 $\beta$ -hydroxyl sex steroids<sup>88</sup>); and 2) their direct interaction with estrogen receptors<sup>89</sup> due to a structure similar to that of estradiol.<sup>85</sup>

To date, evidence for a potential influence of dietary isoflavones on the timing of puberty stems only from a recent analysis of the DONALD Study. Examining data from 227 German girls and boys, Cheng et al.<sup>65</sup> reported that girls ( $n = 119$ ) whose dietary intake of isoflavones was in the highest tertile ( $\geq 423$   $\mu\text{g}/\text{day}$ ) experienced their Tanner stage 2 for breast development approximately 0.7 years ( $\sim 8$  months) later and reached their peak height velocity approximately 0.6 years ( $\sim 7$  months) later than girls whose intake was in the lowest tertile ( $\leq 22$   $\mu\text{g}/\text{day}$ ), controlling for prepubertal BMI and fiber intake. However, dietary isoflavone intakes were not found to be implicated in the timing of puberty in boys.

While this study has shown a strong association, further studies are needed before firm conclusions on the relevance of dietary isoflavones for the timing of puberty can be drawn. In particular, prospective data that investigate the complex interplay of “nutritional estrogens” and endogenous estrogen levels are warranted.

*Protein intake (girls and boys).* Due to its stimulatory effect on IGF-1 secretion<sup>90</sup> (Figure 3), animal protein intake during prepuberty may be of relevance. Günther et al.<sup>66</sup> observed that boys and girls aged 5–6 years whose animal protein intake was in the highest tertile experienced their ATO, APHV, and menarche/voice break approximately 0.6 years ( $\sim 7$  months) earlier than boys and girls whose intake was in the lowest tertile. Similarly, Berkey et al.<sup>68</sup> found that 3–5-year-old girls with a 1 standard deviation (SD) higher animal protein intake

(approximately 8 g/day) experienced menarche 0.63 years ( $\sim 7$  months) earlier. Furthermore, in 3,298 British girls, the risk of early occurrence of menarche increased by 1.17-fold per 1 SD increase in animal protein intake (approximately 1.1 g/day).<sup>78</sup> Although dietary animal protein intake may increase adrenarchal androgen secretion in children,<sup>91</sup> Remer et al.<sup>67</sup> demonstrated that the association between animal protein intake and ATO, APHV, and menarche/voice break was independent of the effects of adrenal androgens. However, animal protein intake was not associated with age at onset of breast, genital, and pubic hair development,<sup>67</sup> which may be relevantly modulated by the maturation of the hypothalamic-pituitary-adrenal (HPA) axis.<sup>60</sup>

Three studies<sup>66,70,78</sup> have addressed the relevance of animal-protein-contributing food groups. Protein intake from cow milk and dairy products is suggested to stimulate the secretion of IGF-1.<sup>92</sup> Günther et al.<sup>66</sup> found that 5–6-year-old children whose protein intake from cow milk and dairy products was within the highest tertile experienced ATO approximately 0.4 years ( $\sim 5$  months) earlier than children in the lowest tertile. Conversely, Rogers et al.<sup>78</sup> reported that a higher meat intake in childhood was strongly associated with earlier age at menarche, i.e., the risk of early occurrence of menarche was 1.57-fold higher for girls in the category with the highest meat intake ( $> 8$  portions/week) than for girls in the lowest category ( $< 4$  portions/week). This finding is in line with a previous analysis by Kissinger and Sanchez,<sup>70</sup> who used data from 230 US girls and showed that those in the highest quartile of meat intake reached menarche 6 months earlier than girls in the lowest quartile.

To date, three observational studies have focused on the association of vegetable protein intake in childhood with the timing of puberty in girls<sup>68,69</sup> and in both genders.<sup>66</sup> de Ridder et al.<sup>69</sup> reported an association of higher vegetable protein intake with later breast development in 63 Dutch girls. Berkey et al.<sup>68</sup> suggested that girls aged 3–5 years with a 1-SD higher vegetable protein intake (approximately 3 g/day) experienced menarche 0.87 years ( $\sim 10$  months) later. Similarly, in a recent analysis of the DONALD Study, Günther et al.<sup>66</sup> reported that 3–4-year-old children whose dietary intake of vegetable protein was in the highest tertile reached their ATO, APHV, and menarche/voice break approximately 0.5 years ( $\sim 6$  months) later than children whose intake was in the lowest tertile. Due to the high content of dietary isoflavone or fiber intake in a number of plant foods and the negative association of vegetable protein intake with animal protein intake, studies that analyzed the association of vegetable protein intake in childhood with the timing of puberty may indirectly have addressed the effect of prepubertal dietary isoflavone/fiber/animal protein intake on the timing of puberty.

In summary, current evidence consistently suggests dietary protein intake is relevant for the timing of puberty; i.e., children with a higher vegetable protein intake may experience both earlier and later stages of pubertal development, up to 0.6 years (~7 months) later, while a prepubertal diet rich in animal protein, i.e., milk, dairy products, and/or meat, appears to be related to an earlier pubertal development of up to 0.6 years (~7 months).

*Dietary micronutrients (girls only).* It has been hypothesized that carotenoids may exert a peripheral antiestrogenic effect, such that they could perhaps interfere with the release of low concentrations of gonadotropins and prolactin.<sup>72</sup> Moreover, lower intakes of vitamin C and  $\beta$ -carotene have been shown to be associated with higher leptin concentrations in children aged 6–14 years,<sup>93</sup> and leptin has been proposed to be a signal for puberty onset (Figure 3).

Using data from 213 girls in the United States, Maclure et al.<sup>72</sup> reported that higher vitamin A intake in girls was related to earlier age at menarche. In contrast, a prospective study of 666 Canadian girls<sup>76</sup> found that higher vitamin A intake was associated with a later age at menarche. In contrast to the finding that lower vitamin C intake is associated with higher leptin concentrations,<sup>93</sup> which may, in turn, predispose to an earlier timing of puberty,<sup>94</sup> Moisan et al.<sup>75</sup> found that lower vitamin C intakes at age 10–13 years were related to a later menarcheal age in 2,299 Canadian girls.

In addition, in 3,298 British girls, higher intakes of magnesium at age 10 years, or of zinc at age 7 years, were related to an earlier menarcheal age.<sup>78</sup> These associations may partly reflect the fact that meat is a good source of bioavailable zinc and, to some degree, of magnesium as well. Finally, Kissinger and Sanchez<sup>70</sup> reported that 230 US girls with higher intakes of thiamine or iron at age 9–15 years had a later menarcheal age.

Taken together, the currently available findings regarding the influence of micronutrients on the timing of puberty are controversial. In particular, possible mechanisms mediating potential associations of micronutrients with the timing of puberty should be unraveled.

*Dietary quality (girls and boys).* It is conceivable that macronutrients, micronutrients, and/or food groups may influence puberty onset through their combined effects.

To date, the association of overall dietary quality in childhood with the timing of puberty has only been investigated in the DONALD Study,<sup>64</sup> which found higher dietary quality in prepuberty to be associated with later ATO in both boys and girls. In this study, higher dietary quality was defined as adherence to nutrient-specific recommendations; i.e., a higher dietary quality

was characterized by a lower intake of total fat and higher intakes of carbohydrates, fiber, and micronutrients. Children with higher dietary quality experienced their pubertal growth spurt approximately 0.4 years (~5 months) later than children with lower dietary quality. This association was observed independently of prepubertal body composition.

In this analysis, overall dietary quality was defined by a dietary quality index, which is an *a priori* dietary pattern created on the basis of previous knowledge.<sup>95</sup> Dietary quality indices do not consider the correlation structure of foods and nutrient intakes. In this context, the statistical method known as reduced rank regression<sup>96</sup> may be worth considering in future analyses, since it would allow the extraction of a food pattern that maximally explains the variation of hormones. Such a pattern can then be evaluated in its ability to predict the timing of pubertal markers. In conclusion, initial prospective observational data from the DONALD Study suggests that dietary quality in childhood is relevant for the timing of puberty.

## Nutrition in early life

*Breastfeeding – direct evidence.* Nutrition during early life might also play an important role in the timing of puberty. Direct evidence for such a link is largely confined to studies investigating the association of breastfeeding with pubertal timing. Prospective studies have not, however, found an independent association of breastfeeding with age at menarche,<sup>73,76,97,98</sup> ATO, or APHV.<sup>97</sup> In line with this is the observation from the DONALD Study that protein intake in early childhood (1–2 years) is not critical for the timing of early and late pubertal markers.<sup>66</sup>

*Birth weight – indirect evidence.* Nutritional imbalances during pregnancy may be implicated in the programming of the fetal metabolism, including the setting of the hypothalamic-pituitary axis<sup>45</sup> on the one hand, and of insulin resistance and body composition on the other hand, which could, in turn, trigger subsequent hormonal changes affecting pubertal timing<sup>99</sup> (Figure 3). To date, evidence linking prenatal nutritional imbalances to the timing of puberty is only indirect, using birth weight as a marker of the intrauterine environment. Nutritional factors during pregnancy that have been discussed in relation to an influence on birth weight range from malnourishment<sup>100</sup> to deficiencies in micronutrients vitamin B<sub>12</sub>, or docosahexaenoic acid intake.<sup>101</sup> A recent study has suggested maternal vitamin D status in early pregnancy may play a role in both birth weight and subsequent growth velocity.<sup>102</sup> With respect to the timing of puberty, a lower birth weight has been related to an earlier menarche.<sup>45,103–105</sup> The DONALD Study confirmed



this association for other pubertal markers (ATO and APHV) in both boys and girls.<sup>97</sup>

*Interactions of pre- and postnatal influences.* It has been suggested that the postnatal nutritional environment will, to some extent, override prenatal nutritional influences (e.g., prepubertal nutritional deprivation will result in delayed sexual maturity, irrespective of prenatal influences).<sup>100</sup> On the other hand, lower birth weight predisposes to rapid weight gain among those who encounter – in contrast to what they had “anticipated” in the uterus – a sufficient or even excessive nutrient supply (mismatch theory).<sup>106</sup> Rapid weight gain during infancy and early childhood has, in turn, repeatedly been linked to a notably earlier onset of menarche<sup>46,103,105</sup> and other early and late pubertal markers.<sup>48,97,107</sup> In line with the mismatch theory outlined above, pre- and postnatal genetic/intrauterine and nutritional influences appear to interact; i.e., infants with a lower birth weight and subsequent rapid weight gain during childhood will experience the earliest puberty onset.<sup>45,97,103,108–110</sup>

### Environmental stressors in relation to nutrition

Apart from nutrition (both in midchildhood and in early life), a variety of stressors, including psychosocial<sup>111</sup> and physical (e.g., nutritional deprivation and excessive physical exercise) stress forms, may influence pubertal maturation. Delayed pubertal development has been demonstrated in highly trained runners<sup>112,113</sup> and elite gymnasts,<sup>114</sup> who usually have increased glucocorticoid levels induced by chronic activation of the HPA axis.<sup>115,116</sup> When in excess, glucocorticoids can inhibit growth hormone secretion,<sup>117</sup> linear growth, and skeletal maturation in children<sup>118,119</sup>; they may also suppress the functioning of the hypothalamic-pituitary-gonadal axis (140,141,142). However, few studies investigating the influence of nutrition on the timing of puberty have taken physical activity into account, and most of them used semiquantitative data. Thus, the extent to which physical activity may relevantly modify nutritional influence on pubertal timing remains to be determined.

### CONCLUSION

The contribution of childhood overweight to an earlier timing of puberty, although obviously existing, may have been overemphasized, since secular trends toward an earlier age at menarche have not been a universal finding during the recent obesity epidemic. Nonetheless, evidence is convincing that girls with higher prepubertal body mass commonly experience an earlier menarche. Whether the importance of prepubertal body composi-

tion extends to other pubertal markers is uncertain, because menarche (as the endpoint of a complex sequence of maturational events) is primarily controlled by hypothalamic-pituitary-ovarian maturation, whereas initiation of breast and pubic hair development may be relevantly modulated by the maturation of the HPA axis. Therefore, different pubertal events might respond differently to the influence of environmental or peripheral signals, and in this regard, boys and girls also appear to respond differently, at least in part.

The recent focus on the relevance of overweight has shifted from nutritional factors that affect the timing of puberty to those related to energy imbalance. Current observational studies show magnitudes of associations between dietary factors and the timing of puberty that are in the order of effect sizes observed for endocrine factors; for example, children with a more intensive adrenarchal process (i.e., in the highest group of adrenal androgen excretion) experience onset of breast and genital development 9 months earlier. Similarly, children with the highest intakes of vegetable proteins or animal protein experience at least their growth-related puberty onset up to 7 months later or 7 months earlier, respectively, than children in the lowest groups. Moreover, girls with the highest levels of dietary isoflavone intake may experience their onset of breast development and reach their peak height velocity approximately 7–8 months later than girls with the lowest levels of intake. Delays in pubertal timing in response to beneficial dietary habits (higher intakes of vegetable protein and isoflavones, and lower intakes of animal protein) may be of substantial public health relevance: A later age at both peak height velocity and menarche is related to a reduced risk of breast cancer, and a later menarcheal age is also associated with a lower total mortality. Hence, a delay in the timing of puberty by approximately 7–8 months that is achievable with dietary modifications may translate into a 6% reduction in breast cancer risk and an up to 3.4% decrease in total mortality.

### Acknowledgment

*Funding.* This review was funded by a grant from the Long-range Research Initiative (LRI) of the European Chemical Industry Council (Cefic).

*Declaration of interest.* The authors have no relevant interests to declare.

### REFERENCES

1. Velie EM, Nechuta S, Osuch JR. Lifetime reproductive and anthropometric risk factors for breast cancer in postmenopausal women. *Breast Dis.* 2005;24:17–35.
2. Berkey CS, Frazier AL, Gardner JD, et al. Adolescence and breast carcinoma risk. *Cancer.* 1999;85:2400–2409.

3. Giles GG, Severi G, English DR, et al. Early growth, adult body size and prostate cancer risk. *Int J Cancer*. 2003;103:241–245.
4. Forman D, Pike MC, Davey G, et al. Aetiology of testicular cancer: association with congenital abnormalities, age at puberty, infertility, and exercise. *BMJ*. 1994;308:1393–1399.
5. Garner MJ, Turner MC, Ghadirian P, et al. Epidemiology of testicular cancer: an overview. *Int J Cancer*. 2005;116:331–339.
6. Jacobsen BK, Heuch I, Kvale G. Association of low age at menarche with increased all-cause mortality: a 37-year follow-up of 61,319 Norwegian women. *Am J Epidemiol*. 2007;166:1431–1437.
7. Jacobsen BK, Oda K, Knutsen SF, et al. Age at menarche, total mortality and mortality from ischaemic heart disease and stroke: the Adventist Health Study, 1976–88. *Int J Epidemiol*. 2009;38:245–252.
8. Frontini MG, Srinivasan SR, Berenson GS. Longitudinal changes in risk variables underlying metabolic Syndrome X from childhood to young adulthood in female subjects with a history of early menarche: the Bogalusa Heart Study. *Int J Obes Relat Metab Disord*. 2003;27:1398–1404.
9. Remsberg KE, Demerath EW, Schubert CM, et al. Early menarche and the development of cardiovascular disease risk factors in adolescent girls: the Fels Longitudinal Study. *J Clin Endocrinol Metab*. 2005;90:2718–2724.
10. Cole TJ. The secular trend in human physical growth: a biological view. *Econ Hum Biol*. 2003;1:161–168.
11. Ogden CL, Flegal KM, Carroll MD, et al. Prevalence and trends in overweight among US children and adolescents, 1999–2000. *JAMA*. 2002;288:1728–1732.
12. Hedley AA, Ogden CL, Johnson CL, et al. Prevalence of overweight and obesity among US children, adolescents, and adults, 1999–2002. *JAMA*. 2004;291:2847–2850.
13. Ogden CL, Carroll MD, Curtin LR, et al. Prevalence of overweight and obesity in the United States, 1999–2004. *JAMA*. 2006;295:1549–1555.
14. Wang Y, Lobstein T. Worldwide trends in childhood overweight and obesity. *Int J Pediatr Obes*. 2006;1:11–25.
15. Kaplowitz P. Pubertal development in girls: secular trends. *Curr Opin Obstet Gynecol*. 2006;18:487–491.
16. Ong KK, Ahmed ML, Dunger DB. Lessons from large population studies on timing and tempo of puberty (secular trends and relation to body size): the European trend. *Mol Cell Endocrinol*. 2006;254–255:8–12.
17. Cole TJ. Secular trends in growth. *Proc Nutr Soc*. 2000;59:317–324.
18. Fredriks AM, van Buuren S, Burgmeijer RJ, et al. Continuing positive secular growth change in The Netherlands 1955–1997. *Pediatr Res*. 2000;47:316–323.
19. Helm P, Helm S. Decrease in menarcheal age from 1966 to 1983 in Denmark. *Acta Obstet Gynecol Scand*. 1984;63:633–635.
20. Helm P, Grolund L. A halt in the secular trend towards earlier menarche in Denmark. *Acta Obstet Gynecol Scand*. 1998;77:198–200.
21. Rimpela AH, Rimpela MK. Towards an equal distribution of health? Socioeconomic and regional differences of the secular trend of the age of menarche in Finland from 1979 to 1989. *Acta Paediatr*. 1993;82:87–90.
22. Tryggvadottir L, Tulinius H, Larusdottir M. A decline and a halt in mean age at menarche in Iceland. *Ann Hum Biol*. 1994;21:179–186.
23. Mul D, Fredriks AM, van Buuren S, et al. Pubertal development in The Netherlands 1965–1997. *Pediatr Res*. 2001;50:479–486.
24. Dann TC, Roberts DF. Menarcheal age in University of Warwick young women. *J Biosoc Sci*. 1993;25:531–538.
25. Hauspie RC, Vercauteren M, Susanne C. Secular changes in growth and maturation: an update. *Acta Paediatr Suppl*. 1997;423:20–27.
26. Vercauteren M, Susanne C. The secular trend of height and menarche in Belgium: are there any signs of a future stop? *Eur J Pediatr*. 1985;144:306–309.
27. Prebeg Z, Slugan N, Reic L, et al. Secular growth changes in school children in Croatia. *Coll Antropol*. 1994;18:309–316.
28. Lindgren GW, Degerfors IL, Fredriksson A, et al. Menarche 1990 in Stockholm schoolgirls. *Acta Paediatr Scand*. 1991;80:953–955.
29. Freedman DS, Khan LK, Serdula MK, et al. Relation of age at menarche to race, time period, and anthropometric dimensions: the Bogalusa Heart Study. *Pediatrics*. 2002;110:e43.
30. Anderson SE, Dallal GE, Must A. Relative weight and race influence average age at menarche: results from two nationally representative surveys of US girls studied 25 years apart. *Pediatrics*. 2003;111:844–850.
31. Anderson SE, Must A. Interpreting the continued decline in the average age at menarche: results from two nationally representative surveys of U.S. girls studied 10 years apart. *J Pediatr*. 2005;147:753–760.
32. Wyshak G. Secular changes in age at menarche in a sample of US women. *Ann Hum Biol*. 1983;10:75–77.
33. Herman-Giddens ME, Slora EJ, Wasserman RC, et al. Secondary sexual characteristics and menses in young girls seen in office practice: a study from the Pediatric Research in Office Settings network. *Pediatrics*. 1997;99:505–512.
34. Malina RM. Research on secular trends in auxology. *Anthropol Anz*. 1990;48:209–227.
35. Wu T, Mendola P, Buck GM. Ethnic differences in the presence of secondary sex characteristics and menarche among US girls: the Third National Health and Nutrition Examination Survey, 1988–1994. *Pediatrics*. 2002;110:752–757.
36. Harlan WR, Harlan EA, Grillo GP. Secondary sex characteristics of girls 12 to 17 years of age: the U.S. Health Examination Survey. *J Pediatr*. 1980;96:1074–1078.
37. Huen KF, Leung SS, Lau JT, et al. Secular trend in the sexual maturation of southern Chinese girls. *Acta Paediatr*. 1997;86:1121–1124.
38. Hoshi H, Kouchi M. Secular trend of the age at menarche of Japanese girls with special regard to the secular acceleration of the age at peak height velocity. *Hum Biol*. 1981;53:593–598.
39. Singh SP, Malhotra P. Secular shift in menarcheal age of Patiala (India) school-girls between 1974 and 1986. *Ann Hum Biol*. 1988;15:77–80.
40. Malina RM, Pena Reyes ME, Tan SK, et al. Secular change in age at menarche in rural Oaxaca, southern Mexico: 1968–2000. *Ann Hum Biol*. 2004;31:634–646.
41. Gluckman PD, Hanson MA. The developmental origins of health and disease: an overview. In: Gluckman P, Hanson M, eds. *Developmental Origins of Health and Disease*. Cambridge: Cambridge University Press; 2006:33–50.
42. Koprowski C, Ross RK, Mack WJ, et al. Diet, body size and menarche in a multi-ethnic cohort. *Br J Cancer*. 1999;79:1907–1911.
43. Freedman DS, Khan LK, Serdula MK, et al. The relation of menarcheal age to obesity in childhood and adulthood: the Bogalusa heart study. *BMC Pediatr*. 2003;3:3.
44. Ellison PT. Skeletal growth, fatness and menarcheal age: a comparison of two hypotheses. *Hum Biol*. 1982;54:269–281.
45. Cooper C, Kuh D, Egger P, et al. Childhood growth and age at menarche. *Br J Obstet Gynaecol*. 1996;103:814–817.
46. dos Santos Silva I, De Stavola BL, Mann V, et al. Prenatal factors, childhood growth trajectories and age at menarche. *Int J Epidemiol*. 2002;31:405–412.
47. Akglaede L, Juul A, Olsen LW, et al. Age at puberty and the emerging obesity epidemic. *PLoS ONE*. 2009;4:e8450.
48. Boyne MS, Thame M, Osmond C, et al. Growth, body composition, and the onset of puberty: longitudinal observations in Afro-Caribbean children. *J Clin Endocrinol Metab*. 2010;95:3194–3200.
49. Buyken AE, Karaolis-Danckert N, Remer T. Association of prepubertal body composition in healthy girls and boys with the timing of early and late pubertal markers. *Am J Clin Nutr*. 2009;89:221–230.
50. He Q, Karlberg J. BMI in childhood and its association with height gain, timing of puberty, and final height. *Pediatr Res*. 2001;49:244–251.
51. Mamun AA, Hayatbakhsh MR, O'Callaghan M, et al. Early overweight and pubertal maturation – pathways of association with young adults' overweight: a longitudinal study. *Int J Obes (Lond)*. 2009;33:14–20.
52. Juul A, Magnusdottir S, Scheike T, et al. Age at voice break in Danish boys: effects of pre-pubertal body mass index and secular trend. *Int J Androl*. 2007;30:537–542.
53. Sandhu J, Ben-Shlomo Y, Cole TJ, et al. The impact of childhood body mass index on timing of puberty, adult stature and obesity: a follow-up study based on adolescent anthropometry recorded at Christ's Hospital (1936–1964). *Int J Obes (Lond)*. 2006;30:14–22.
54. Lee JM, Kaciroti N, Appugliese D, et al. Body mass index and timing of pubertal initiation in boys. *Arch Pediatr Adolesc Med*. 2010;164:139–144.
55. Biason-Lauber A, Zachmann M, Schoenle EJ. Effect of leptin on CYP17 enzymatic activities in human adrenal cells: new insight in the onset of adrenarche. *Endocrinology*. 2000;141:1446–1454.
56. Kristiansen SB, Endoh A, Casson PR, et al. Induction of steroidogenic enzyme genes by insulin and IGF-I in cultured adult human adrenocortical cells. *Steroids*. 1997;62:258–265.
57. l'Allemand D, Penhoat A, Lebrethon MC, et al. Insulin-like growth factors enhance steroidogenic enzyme and corticotropin receptor messenger ribonucleic acid levels and corticotropin steroidogenic responsiveness in cultured human adrenocortical cells. *J Clin Endocrinol Metab*. 1996;81:3892–3897.
58. Ojeda SR, Terasawa E. Neuroendocrine regulation of puberty. In: Pfaff D, Arnold A, Etgen A, Fahrbach S, Moss R, Rubin R, eds. *Hormones, Brain and Behavior*. New York: Elsevier; 2002:589–659.
59. Holly JM, Smith CP, Dunger DB, et al. Relationship between the pubertal fall in sex hormone binding globulin and insulin-like growth factor binding protein-I. A synchronized approach to pubertal development? *Clin Endocrinol (Oxf)*. 1989;31:277–284.
60. Ahmed ML, Ong KK, Dunger DB. Childhood obesity and the timing of puberty. *Trends Endocrinol Metab*. 2009;20:237–242.
61. Forney JP, Milewich L, Chen GT, et al. Aromatization of androstenedione to estrone by human adipose tissue in vitro. Correlation with adipose tissue mass, age, and endometrial neoplasia. *J Clin Endocrinol Metab*. 1981;53:192–199.
62. Foster DL, Jackson LM, Padmanabhan V. Programming of GnRH feedback controls timing puberty and adult reproductive activity. *Mol Cell Endocrinol*. 2006;254–255:109–119.
63. Plant TM, Barker-Gibb ML. Neurobiological mechanisms of puberty in higher primates. *Hum Reprod Update*. 2004;10:67–77.
64. Cheng G, Gerlach S, Libuda L, et al. Diet quality in childhood is prospectively associated with the timing of puberty but not with body composition at puberty onset. *J Nutr*. 2010;140:95–102.
65. Cheng G, Remer T, Prinz-Langenohl R, et al. Relation of isoflavones and fiber intake in childhood to the timing of puberty. *Am J Clin Nutr*. 2010;92:556–564.

66. Günther AL, Karaolis-Danckert N, Kroke A, et al. Dietary protein intake throughout childhood is associated with the timing of puberty. *J Nutr.* 2010;140:565–571.
67. Remer T, Shi L, Buyken AE, et al. Prepubertal adrenarchal androgens and animal protein intake independently and differentially influence pubertal timing. *J Clin Endocrinol Metab.* 2010;95:3002–3009.
68. Berkey CS, Gardner JD, Frazier AL, et al. Relation of childhood diet and body size to menarche and adolescent growth in girls. *Am J Epidemiol.* 2000;152:446–452.
69. de Ridder CM, Thijssen JH, Van't Veer P, et al. Dietary habits, sexual maturation, and plasma hormones in pubertal girls: a longitudinal study. *Am J Clin Nutr.* 1991;54:805–813.
70. Kissinger DG, Sanchez A. The association of dietary factors with the age of menarche. *Nutr Res.* 1987;7:471–479.
71. Koo MM, Rohan TE, Jain M, et al. A cohort study of dietary fibre intake and menarche. *Public Health Nutr.* 2002;5:353–360.
72. Maclure M, Travis LB, Willett W, et al. A prospective cohort study of nutrient intake and age at menarche. *Am J Clin Nutr.* 1991;54:649–656.
73. Merzenich H, Boeing H, Wahrendorf J. Dietary fat and sports activity as determinants for age at menarche. *Am J Epidemiol.* 1993;138:217–224.
74. Meyer F, Moisan J, Marcoux D, et al. Dietary and physical determinants of menarche. *Epidemiology.* 1990;1:377–381.
75. Moisan J, Meyer F, Gingras S. Diet and age at menarche. *Cancer Causes Control.* 1990;1:149–154.
76. Moisan J, Meyer F, Gingras S. A nested case-control study of the correlates of early menarche. *Am J Epidemiol.* 1990;132:953–961.
77. Petridou E, Syrigou E, Toupadaki N, et al. Determinants of age at menarche as early life predictors of breast cancer risk. *Int J Cancer.* 1996;68:193–198.
78. Rogers IS, Northstone K, Dunger DB, et al. Diet throughout childhood and age at menarche in a contemporary cohort of British girls. *Public Health Nutr.* 2010;13:2052–2063.
79. Aubertin-Leheudre M, Gorbach S, Woods M, et al. Fat/fiber intakes and sex hormones in healthy premenopausal women in USA. *J Steroid Biochem Mol Biol.* 2008;112:32–39.
80. Shi L, Remer T, Buyken AE, et al. Prepubertal urinary estrogen excretion and its relationship with pubertal timing. *Am J Physiol Endocrinol Metab.* 2010;299:E990–E997.
81. Goldin BR, Woods MN, Spiegelman DL, et al. The effect of dietary fat and fiber on serum estrogen concentrations in premenopausal women under controlled dietary conditions. *Cancer.* 1994;74:1125–1131.
82. Arts CJ, Govers CA, van den Berg H, et al. In vitro binding of estrogens by dietary fiber and the in vivo apparent digestibility tested in pigs. *J Steroid Biochem Mol Biol.* 1991;38:621–628.
83. Adlercreutz H, Hockerstedt K, Bannwart C, et al. Effect of dietary components, including lignans and phytoestrogens, on enterohepatic circulation and liver metabolism of estrogens and on sex hormone binding globulin (SHBG). *J Steroid Biochem.* 1987;27:1135–1144.
84. Horn-Ross PL, Lee M, John EM, et al. Sources of phytoestrogen exposure among non-Asian women in California, USA. *Cancer Causes Control.* 2000;11:299–302.
85. Knight DC, Eden JA. Phytoestrogens – a short review. *Maturitas.* 1995;22:167–175.
86. Adlercreutz H, Bannwart C, Wähälä K, et al. Inhibition of human aromatase by mammalian lignans and isoflavonoid phytoestrogens. *J Steroid Biochem Mol Biol.* 1993;44:147–153.
87. Xu WH, Dai Q, Xiang YB, et al. Interaction of soy food and tea consumption with CYP19A1 genetic polymorphisms in the development of endometrial cancer. *Am J Epidemiol.* 2007;166:1420–1430.
88. Gunnarsson C, Ahnstrom M, Kirschner K, et al. Amplification of HSD17B1 and ERBB2 in primary breast cancer. *Oncogene.* 2003;22:34–40.
89. Kuiper GG, Lemmen JG, Carlsson B, et al. Interaction of estrogenic chemicals and phytoestrogens with estrogen receptor beta. *Endocrinology.* 1998;139:4252–4263.
90. Budek AZ, Hoppe C, Michaelsen KF, et al. Associations of total, dairy, and meat protein with markers for bone turnover in healthy, prepubertal boys. *J Nutr.* 2007;137:930–934.
91. Shi L, Wudy SA, Buyken AE, et al. Body fat and animal protein intakes are associated with adrenal androgen secretion in children. *Am J Clin Nutr.* 2009;90:1321–1328.
92. Hoppe C, Udam TR, Lauritzen L, et al. Animal protein intake, serum insulin-like growth factor I, and growth in healthy 2.5-y-old Danish children. *Am J Clin Nutr.* 2004;80:447–452.
93. Aeberli I, Molinari L, Spinaz G, et al. Dietary intakes of fat and antioxidant vitamins are predictors of subclinical inflammation in overweight Swiss children. *Am J Clin Nutr.* 2006;84:748–755.
94. Welt CK, Chan JL, Bullen J, et al. Recombinant human leptin in women with hypothalamic amenorrhea. *N Engl J Med.* 2004;351:987–997.
95. Hu FB. Dietary pattern analysis: a new direction in nutritional epidemiology. *Curr Opin Lipidol.* 2002;13:3–9.
96. Hoffmann K, Schulze MB, Schienkiewitz A, et al. Application of a new statistical method to derive dietary patterns in nutritional epidemiology. *Am J Epidemiol.* 2004;159:935–944.
97. Karaolis-Danckert N, Buyken AE, Sonntag A, et al. Birth and early life influences on the timing of puberty onset: results from the DONALD (Dortmund Nutritional and Anthropometric Longitudinally Designed) Study. *Am J Clin Nutr.* 2009;90:1559–1565.
98. Blell M, Pollard TM, Pearce MS. Predictors of age at menarche in the Newcastle Thousand Families Study. *J Biosoc Sci.* 2008;40:563–575.
99. Dunger DB, Ahmed ML, Ong KK. Early and late weight gain and the timing of puberty. *Mol Cell Endocrinol.* 2006;254–255:140–145.
100. Mishra GD, Cooper R, Tom SE, et al. Early life circumstances and their impact on menarche and menopause. *Womens Health (Lond Engl).* 2009;5:175–190.
101. Muthayya S. Maternal nutrition & low birth weight – what is really important? *Indian J Med Res.* 2009;130:600–608.
102. Leffelaar ER, Vrijotte TG, van Eijsden M. Maternal early pregnancy vitamin D status in relation to fetal and neonatal growth: results of the multi-ethnic Amsterdam Born Children and their development cohort. *Br J Nutr.* 2010;104:108–117.
103. Adair LS. Size at birth predicts age at menarche. *Pediatrics.* 2001;107:E59.
104. Ibanez L, Ferrer A, Marcos MV, et al. Early puberty: rapid progression and reduced final height in girls with low birth weight. *Pediatrics.* 2000;106:E72.
105. Terry MB, Ferris JS, Tehranifar P, et al. Birth weight, postnatal growth, and age at menarche. *Am J Epidemiol.* 2009;170:72–79.
106. Gluckman PD, Hanson MA. Evolution, development and timing of puberty. *Trends Endocrinol Metab.* 2006;17:7–12.
107. Lee JM, Appugliese D, Kaciroti N, et al. Weight status in young girls and the onset of puberty. *Pediatrics.* 2007;119:e624–e630.
108. Tam CS, de Zegher F, Garnett SP, et al. Opposing influences of prenatal and postnatal growth on the timing of menarche. *J Clin Endocrinol Metab.* 2006;91:4369–4373.
109. Sloboda DM, Hart R, Doherty DA, et al. Age at menarche: influences of prenatal and postnatal growth. *J Clin Endocrinol Metab.* 2007;92:46–50.
110. Ong KK, Potau N, Petry CJ, et al. Opposing influences of prenatal and postnatal weight gain on adrenarche in normal boys and girls. *J Clin Endocrinol Metab.* 2004;89:2647–2651.
111. Ellis BJ. Timing of pubertal maturation in girls: an integrated life history approach. *Psychol Bull.* 2004;130:920–958.
112. Luger A, Deuster PA, Kyle SB, et al. Acute hypothalamic-pituitary-adrenal responses to the stress of treadmill exercise. Physiologic adaptations to physical training. *N Engl J Med.* 1987;316:1309–1315.
113. MacConnie SE, Barkan A, Lampman RM, et al. Decreased hypothalamic gonadotropin-releasing hormone secretion in male marathon runners. *N Engl J Med.* 1986;315:411–417.
114. Weimann E, Blum WF, Witzel C, et al. Hypoleptinemia in female and male elite gymnasts. *Eur J Clin Invest.* 1999;29:853–860.
115. Charmandari E, Kino T, Souvatzoglou E, et al. Pediatric stress: hormonal mediators and human development. *Horm Res.* 2003;59:161–179.
116. Misra M, Miller KK, Almazan C, et al. Hormonal determinants of regional body composition in adolescent girls with anorexia nervosa and controls. *J Clin Endocrinol Metab.* 2005;90:2580–2587.
117. Burguera B, Muruais C, Penalva A, et al. Dual and selective actions of glucocorticoids upon basal and stimulated growth hormone release in man. *Neuroendocrinology.* 1990;51:51–58.
118. Daughaday WH, Herington AC, Phillips LS. The regulation of growth by endocrines. *Annu Rev Physiol.* 1975;37:211–244.
119. Magiakou MA, Mastorakos G, Chrousos GP. Final stature in patients with endogenous Cushing's syndrome. *J Clin Endocrinol Metab.* 1994;79:1082–1085.
120. Wang Y, Monteiro C, Popkin BM. Trends of obesity and underweight in older children and adolescents in the United States, Brazil, China, and Russia. *Am J Clin Nutr.* 2002;75:971–977.
121. Tremblay MS, Katzmarzyk PT, Willms JD. Temporal trends in overweight and obesity in Canada, 1981–1996. *Int J Obes Relat Metab Disord.* 2002;26:538–543.
122. Willms JD, Tremblay MS, Katzmarzyk PT. Geographic and demographic variation in the prevalence of overweight Canadian children. *Obes Res.* 2003;11:668–673.
123. Kain J, Uauy R, Vio F, et al. Trends in overweight and obesity prevalence in Chilean children: comparison of three definitions. *Eur J Clin Nutr.* 2002;56:200–204.
124. Kautiainen S, Rimpela A, Vikat A, et al. Secular trends in overweight and obesity among Finnish adolescents in 1977–1999. *Int J Obes Relat Metab Disord.* 2002;26:544–552.
125. Fredriks AM, van Buuren S, Wit JM, et al. Body index measurements in 1996–7 compared with 1980. *Arch Dis Child.* 2000;82:107–112.
126. Petersen S, Brulin C, Bergstrom E. Increasing prevalence of overweight in young schoolchildren in Umea, Sweden, from 1986 to 2001. *Acta Paediatr.* 2003;92:848–853.
127. Chinn S, Rona RJ. Prevalence and trends in overweight and obesity in three cross sectional studies of British children, 1974–94. *BMJ.* 2001;322:24–26.

128. Lobstein TJ, James WP, Cole TJ. Increasing levels of excess weight among children in England. *Int J Obes Relat Metab Disord.* 2003;27:1136–1138.
129. National Centre for Social Research. *Health Survey for England 2002.* London: The Stationery Office; 2003.
130. Heude B, Lafay L, Borys JM, et al. Time trend in height, weight, and obesity prevalence in school children from northern France, 1992–2000. *Diabetes Metab.* 2003;29:235–240.
131. Moreno LA, Sarria A, Popkin BM. The nutrition transition in Spain: a European Mediterranean country. *Eur J Clin Nutr.* 2002;56:992–1003.
132. Matsushita Y, Yoshiike N, Kaneda F, et al. Trends in childhood obesity in Japan over the last 25 years from the National Nutrition Survey. *Obes Res.* 2004;12:205–214.
133. Magarey AM, Daniels LA, Boulton TJ. Prevalence of overweight and obesity in Australian children and adolescents: reassessment of 1985 and 1995 data against new standard international definitions. *Med J Aust.* 2001;174:561–564.
134. Kalies H, Lenz J, von Kries R. Prevalence of overweight and obesity and trends in body mass index in German pre-school children, 1982–1997. *Int J Obes Relat Metab Disord.* 2002;26:1211–1217.
135. Briem B. Percent overweight and obesity among 9 year old Icelandic children from 1958–1998 [masters thesis]. Reykjavik: University of Iceland; 1999.
136. Kurth BM, Rosario Schaffrath A. Die Verbreitung von Übergewicht und Adipositas bei Kindern und Jugendlichen in Deutschland. Ergebnisse des bundesweiten Kinder- und Jugendgesundheits surveys (KiGGS). [The prevalence of overweight and obese children and adolescents living in Germany. Results of the German Health Interview and Examination Survey for Children and Adolescents (KiGGS)]. (in German). *Bundesgesundheitsblatt Gesundheitsforschung Gesundheitsschutz.* 2007;50:736–743.
137. van den Hurk K, van Dommelen P, van Buuren S, et al. Prevalence of overweight and obesity in the Netherlands in 2003 compared to 1980 and 1997. *Arch Dis Child.* 2007;92:992–995.
138. Matthiessen J, Velsing Groth M, Fagt S, et al. Prevalence and trends in overweight and obesity among children and adolescents in Denmark. *Scand J Public Health.* 2008;36:153–160.
139. Ogden CL, Carroll MD, Curtin LR, et al. Prevalence of high body mass index in US children and adolescents, 2007–2008. *JAMA.* 2010;303:242–249.
140. Ogden CL, Carroll MD, Flegal KM. High body mass index for age among US children and adolescents, 2003–2006. *JAMA.* 2008;299:2401–2405.
141. Juul A, Teilmann G, Scheike T, et al. Pubertal development in Danish children: comparison of recent European and US data. *Int J Androl.* 2006;29:247–255; discussion 86–90.
142. Marrodan MD, Mesa MS, Arechiga J, et al. Trend in menarcheal age in Spain: rural and urban comparison during a recent period. *Ann Hum Biol.* 2000; 27:313–319.
143. Agarwal DK, Agarwal KN, Upadhyay SK, et al. Physical and sexual growth pattern of affluent Indian children from 5 to 18 years of age. *Indian Pediatr.* 1992;29:1203–1282.
144. Ma HM, Du ML, Luo XP, et al. Onset of breast and pubic hair development and menses in urban Chinese girls. *Pediatrics.* 2009;124:e269–e277.
